# Supplementary material for: De Novo Transcriptome Sequencing in Anopheles funestus Using Illumina RNA-Seq Technology
Source: PLoS One. 2010 Dec 2;5(12):e14202. doi: 10.1371/journal.pone.0014202 (PMC2996306; doi:10.1371/journal.pone.0014202)
Supplement: Table S3 — Protein Divergence GO-Slim Analysis. Excel spreadsheet containing number of contigs in each divergence bin and results of Χ2 analysis for each GO-Slim functional category. (0.04 MB XLS) [file pone.0014202.s003.xls]

## Sheet: Afun.fnl.GOcomp.All.protdist.pr
GOTerm	GOGroup	GONum	NumContigs	NumLow	NumInt	NumHigh	ChiSq	Pvalue
Multicellular organismal development	Biological Process	GO:0007275	355	0.549296	0.28169	0.169014	81.6131	1.89642e-18
Transcription	Biological Process	GO:0006350	272	0.459559	0.3125	0.227941	22.5868	1.24551e-05
Regulation of biological process	Biological Process	GO:0050789	470	0.5	0.314894	0.185106	71.0219	3.78259e-16
Anatomical structure morphogenesis	Biological Process	GO:0009653	281	0.551601	0.27758	0.170819	65.3189	6.54897e-15
Growth	Biological Process	GO:0040007	41	0.439024	0.414634	0.146341	6.52745	0.0382458
Signal transduction	Biological Process	GO:0007165	360	0.519444	0.294444	0.186111	62.7608	2.35328e-14
Protein transport	Biological Process	GO:0015031	117	0.615385	0.222222	0.162393	42.6448	5.493e-10
Cell differentiation	Biological Process	GO:0030154	235	0.561702	0.280851	0.157447	60.7626	6.39105e-14
Protein modification process	Biological Process	GO:0006464	301	0.418605	0.342193	0.239203	14.799	0.000611565
Embryonic development	Biological Process	GO:0009790	124	0.524193	0.322581	0.153226	25.7849	2.51695e-06
Reproduction	Biological Process	GO:0000003	154	0.525974	0.331169	0.142857	34.0689	3.99968e-08
Cellular component organization	Biological Process	GO:0016043	304	0.565789	0.269737	0.164474	79.2831	6.07985e-18
Response to stress	Biological Process	GO:0006950	109	0.440367	0.220183	0.33945	7.94909	0.0187878
DNA metabolic process	Biological Process	GO:0006259	72	0.305556	0.291667	0.402778	1.55197	0.46025
Nucleobase, nucleoside, nucleotide and nucleic acid metabolic process	Biological Process	GO:0006139	241	0.427386	0.323651	0.248963	11.7285	0.00283913
Translation	Biological Process	GO:0006412	156	0.397436	0.371795	0.230769	7.62747	0.0220656
Cellular amino acid and derivative metabolic process	Biological Process	GO:0006519	87	0.402299	0.425287	0.172414	10.2809	0.00585491
Catabolic process	Biological Process	GO:0009056	307	0.439739	0.289902	0.270358	15.939	0.000345856
Organelle organization	Biological Process	GO:0006996	127	0.480315	0.283465	0.23622	12.8478	0.00162228
Transport	Biological Process	GO:0006810	339	0.519174	0.268437	0.212389	54.5394	1.43524e-12
Lipid metabolic process	Biological Process	GO:0006629	113	0.345133	0.460177	0.19469	12.1043	0.00235276
Generation of precursor metabolites and energy	Biological Process	GO:0006091	47	0.829787	0.148936	0.0212766	53.3768	2.56672e-12
Protein metabolic process	Biological Process	GO:0019538	265	0.415094	0.298113	0.286792	8.09997	0.0174227
Cell death	Biological Process	GO:0008219	49	0.44898	0.265306	0.285714	2.99566	0.223615
Cell-cell signaling	Biological Process	GO:0007267	49	0.673469	0.22449	0.102041	26.6833	1.60615e-06
Behavior	Biological Process	GO:0007610	67	0.462687	0.38806	0.149254	10.8406	0.00442592
Carbohydrate metabolic process	Biological Process	GO:0005975	121	0.396694	0.338843	0.264463	3.23831	0.198066
Metabolic process	Biological Process	GO:0008152	283	0.29682	0.40636	0.29682	6.85743	0.0324286
Biological_process	Biological Process	GO:0008150	217	0.488479	0.299539	0.211982	26.1556	2.09117e-06
Ion transport	Biological Process	GO:0006811	117	0.555556	0.290598	0.153846	29.4036	4.12186e-07
Cytoskeleton organization	Biological Process	GO:0007010	126	0.634921	0.253968	0.111111	55.5962	8.46135e-13
Cell cycle	Biological Process	GO:0007049	140	0.5	0.278571	0.221429	18.2823	0.000107162
Cell growth	Biological Process	GO:0016049	17	0.588235	0.294118	0.117647	5.78538	0.055427
response to external stimulus	Biological Process	GO:0009605	39	0.461539	0.410256	0.128205	7.57928	0.0226037
Biosynthetic process	Biological Process	GO:0009058	276	0.384058	0.402174	0.213768	18.0721	0.000119041
Regulation of gene expression, epigenetic	Biological Process	GO:0040029	25	0.36	0.36	0.28	0.327723	0.84886
Cellular homeostasis	Biological Process	GO:0019725	35	0.371429	0.485714	0.142857	6.43502	0.0400547
Cell recognition	Biological Process	GO:0008037	17	0.647059	0.235294	0.117647	7.90514	0.0192052
Response to biotic stimulus	Biological Process	GO:0009607	22	0.545454	0.181818	0.272727	4.73931	0.0935128
Cell communication	Biological Process	GO:0007154	20	0.55	0.35	0.1	6.12433	0.0467863
Secondary metabolic process	Biological Process	GO:0019748	19	0.473684	0.263158	0.263158	1.69309	0.428895
Response to abiotic stimulus	Biological Process	GO:0009628	40	0.5	0.425	0.075	12.4004	0.00202905
Cell proliferation	Biological Process	GO:0008283	42	0.5	0.238095	0.261905	5.30714	0.0703993
Cytoplasm organization	Biological Process	GO:0007028	16	0.6875	0.125	0.1875	9.14509	0.0103316
Nucleic acid binding	Molecular Function	GO:0003676	186	0.360215	0.215054	0.424731	12.7684	0.00168806
Transcription regulator activity	Molecular Function	GO:0030528	116	0.517241	0.353448	0.12931	26.5217	1.74139e-06
Protein binding	Molecular Function	GO:0005515	552	0.447464	0.313406	0.23913	37.2296	8.2355e-09
Binding	Molecular Function	GO:0005488	833	0.326531	0.355342	0.318127	1.98172	0.371256
DNA binding	Molecular Function	GO:0003677	223	0.358744	0.318386	0.32287	0.669576	0.71549
Transcription factor activity	Molecular Function	GO:0003700	85	0.364706	0.352941	0.282353	1.03694	0.595432
Receptor activity	Molecular Function	GO:0004872	134	0.485075	0.380597	0.134328	26.2131	2.03186e-06
Signal transducer activity	Molecular Function	GO:0004871	47	0.574468	0.255319	0.170213	12.8561	0.00161557
Catalytic activity	Molecular Function	GO:0003824	471	0.354565	0.428875	0.216561	33.1083	6.46599e-08
Protein kinase activity	Molecular Function	GO:0004672	152	0.401316	0.322368	0.276316	3.69619	0.157537
Nucleotide binding	Molecular Function	GO:0000166	578	0.482699	0.295848	0.221453	63.2136	1.87647e-14
Transferase activity	Molecular Function	GO:0016740	316	0.278481	0.405063	0.316456	8.0398	0.0179548
Translation factor activity, nucleic acid binding	Molecular Function	GO:0008135	57	0.561404	0.333333	0.105263	17.8587	0.000132447
Calcium ion binding	Molecular Function	GO:0005509	87	0.563218	0.310345	0.126437	25.2032	3.36669e-06
Hydrolase activity	Molecular Function	GO:0016787	415	0.426506	0.310843	0.262651	17.8335	0.000134122
Peptidase activity	Molecular Function	GO:0008233	182	0.302198	0.340659	0.357143	0.842463	0.656238
RNA binding	Molecular Function	GO:0003723	124	0.403226	0.33871	0.258065	3.9893	0.136061
Nuclease activity	Molecular Function	GO:0004518	36	0.166667	0.194444	0.638889	15.0858	0.000529868
Transporter activity	Molecular Function	GO:0005215	208	0.504808	0.360577	0.134615	43.6697	3.29031e-10
Structural molecule activity	Molecular Function	GO:0005198	124	0.435484	0.354839	0.209677	9.8268	0.00734748
Actin binding	Molecular Function	GO:0003779	33	0.909091	0.0606061	0.030303	49.3548	1.91752e-11
Motor activity	Molecular Function	GO:0003774	25	0.64	0.24	0.12	11.1529	0.00378595
Cytoskeletal protein binding	Molecular Function	GO:0008092	25	0.76	0.24	0	22.6877	1.18422e-05
Kinase activity	Molecular Function	GO:0016301	69	0.391304	0.376812	0.231884	3.25632	0.19629
Ion channel activity	Molecular Function	GO:0005216	47	0.617021	0.255319	0.12766	18.2286	0.000110083
Enzyme regulator activity	Molecular Function	GO:0030234	101	0.425743	0.29703	0.277228	3.97585	0.13698
Phosphoprotein phosphatase activity	Molecular Function	GO:0004721	38	0.394737	0.394737	0.210526	2.60442	0.27193
Receptor binding	Molecular Function	GO:0005102	35	0.285714	0.457143	0.257143	2.47383	0.290278
Lipid binding	Molecular Function	GO:0008289	32	0.25	0.53125	0.21875	5.71146	0.0575139
Carbohydrate binding	Molecular Function	GO:0030246	34	0.470588	0.294118	0.235294	3.079	0.214489
Electron carrier activity	Molecular Function	GO:0009055	54	0.351852	0.407407	0.240741	2.36158	0.307035
Intracellular	Cellular Component	GO:0005622	345	0.414493	0.284058	0.301449	10.4565	0.00536298
Nucleus	Cellular Component	GO:0005634	364	0.431319	0.282967	0.285714	15.8437	0.000362727
Nucleoplasm	Cellular Component	GO:0005654	83	0.590361	0.277108	0.13253	27.3744	1.13691e-06
Protein complex	Cellular Component	GO:0043234	412	0.599515	0.252427	0.148058	138.562	8.16047e-31
Cytoplasm	Cellular Component	GO:0005737	264	0.530303	0.306818	0.162879	54.5511	1.42685e-12
Ribosome	Cellular Component	GO:0005840	104	0.326923	0.403846	0.269231	2.88533	0.236297
Mitochondrion	Cellular Component	GO:0005739	149	0.409396	0.422819	0.167785	18.546	9.39274e-05
Nuclear chromosome	Cellular Component	GO:0000228	18	0.166667	0.277778	0.555556	4.30574	0.11615
Chromosome	Cellular Component	GO:0005694	50	0.52	0.3	0.18	8.96441	0.0113084
Cytoskeleton	Cellular Component	GO:0005856	93	0.55914	0.333333	0.107527	28.5635	6.27351e-07
Cytosol	Cellular Component	GO:0005829	71	0.633803	0.225352	0.140845	29.6937	3.56533e-07
Extracellular region	Cellular Component	GO:0005576	67	0.447761	0.283582	0.268657	3.99771	0.13549
Cell	Cellular Component	GO:0005623	595	0.477311	0.356303	0.166387	88.2294	6.93794e-20
Plasma membrane	Cellular Component	GO:0005886	142	0.556338	0.28169	0.161972	34.9745	2.54322e-08
Endoplasmic reticulum	Cellular Component	GO:0005783	62	0.435484	0.387097	0.177419	7.05152	0.0294294
Lipid particle	Cellular Component	GO:0005811	69	0.623188	0.275362	0.101449	29.3093	4.32077e-07
Cytoplasmic membrane-bounded vesicle	Cellular Component	GO:0016023	30	0.633333	0.166667	0.2	12.2315	0.00220787
Golgi apparatus	Cellular Component	GO:0005794	57	0.491228	0.263158	0.245614	6.45362	0.0396839
Nuclear envelope	Cellular Component	GO:0005635	28	0.428571	0.357143	0.214286	2.01847	0.364498
Organelle	Cellular Component	GO:0043226	18	0.388889	0.166667	0.444444	2.32172	0.313217
